# Supplementary material for: Protein imprinted TiO2-coated quantum dots for fluorescent protein sensing prepared by liquid phase deposition
Source: Royal Society of Chemistry journal article supplement (doi:10.1039/c1sm05088e), 2011-01-01
Supplement: c1sm05088e.pdf [file c1sm05088e.pdf]

## Electronic Supplementary Information

### Protein imprinted $\text{TiO}_2$ -coated quantum dots for fluorescent protein sensing prepared by liquid phase deposition

Junji Inoue, Tooru Ooya and Toshifumi Takeuchi\*

*1-1 Rokkodai-cho, Nada-ku, Kobe 657-8501, Japan. Fax: +81 78 803 6258;  
Tel: 81 78 803 6158; E-mail: Takeuchi@gold.kobe-u.ac.jp*

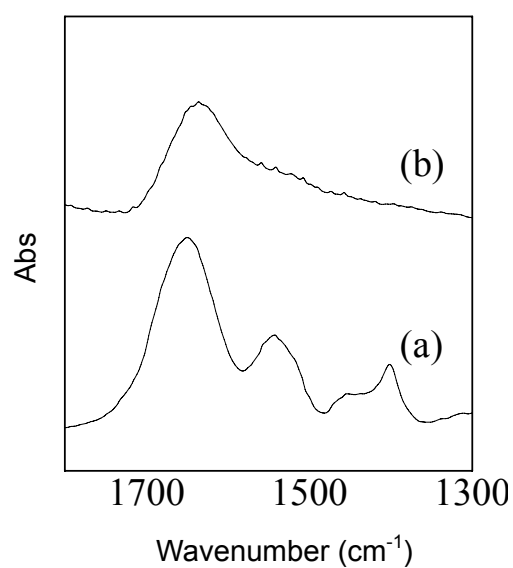

Figure S1. FT-IR spectra of ei-RNase-imprinted  $\text{TiO}_2/\text{Qdots}$  before (a) and after washing.

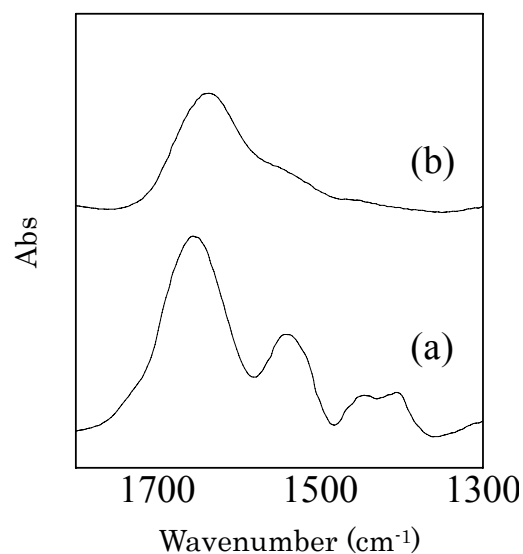

Figure S2. FT-IR spectra of ci-RNase-imprinted  $\text{TiO}_2/\text{Qdots}$  before (a) and after washing.

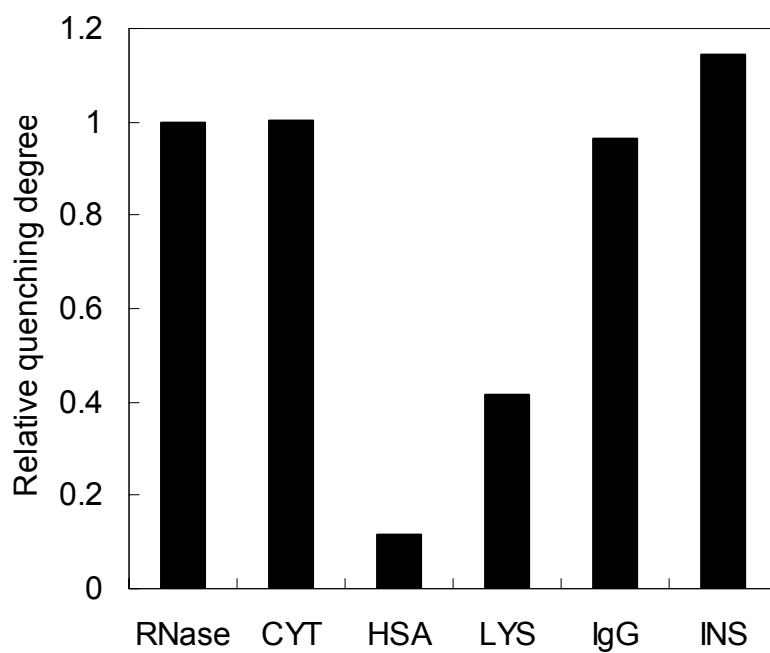

Figure S3. Selectivity of ei-RNase-imprinted  $\text{TiO}_2/\text{Qdots}$  toward various proteins. Relative quenching degree was calculated by dividing a quenching degree of tested protein by that of RNase.
